# Supplementary material for: Enhancing primary care capacity in chronic kidney disease management: a quality improvement educational initiative
Source: HighWire-hosted journal article supplement (doi:10.1136/bmjopen-2020-046068), 2021-11-01

Supplemental File 1. Workshop participant practice locations by Alberta Health Services (AHS) zone.

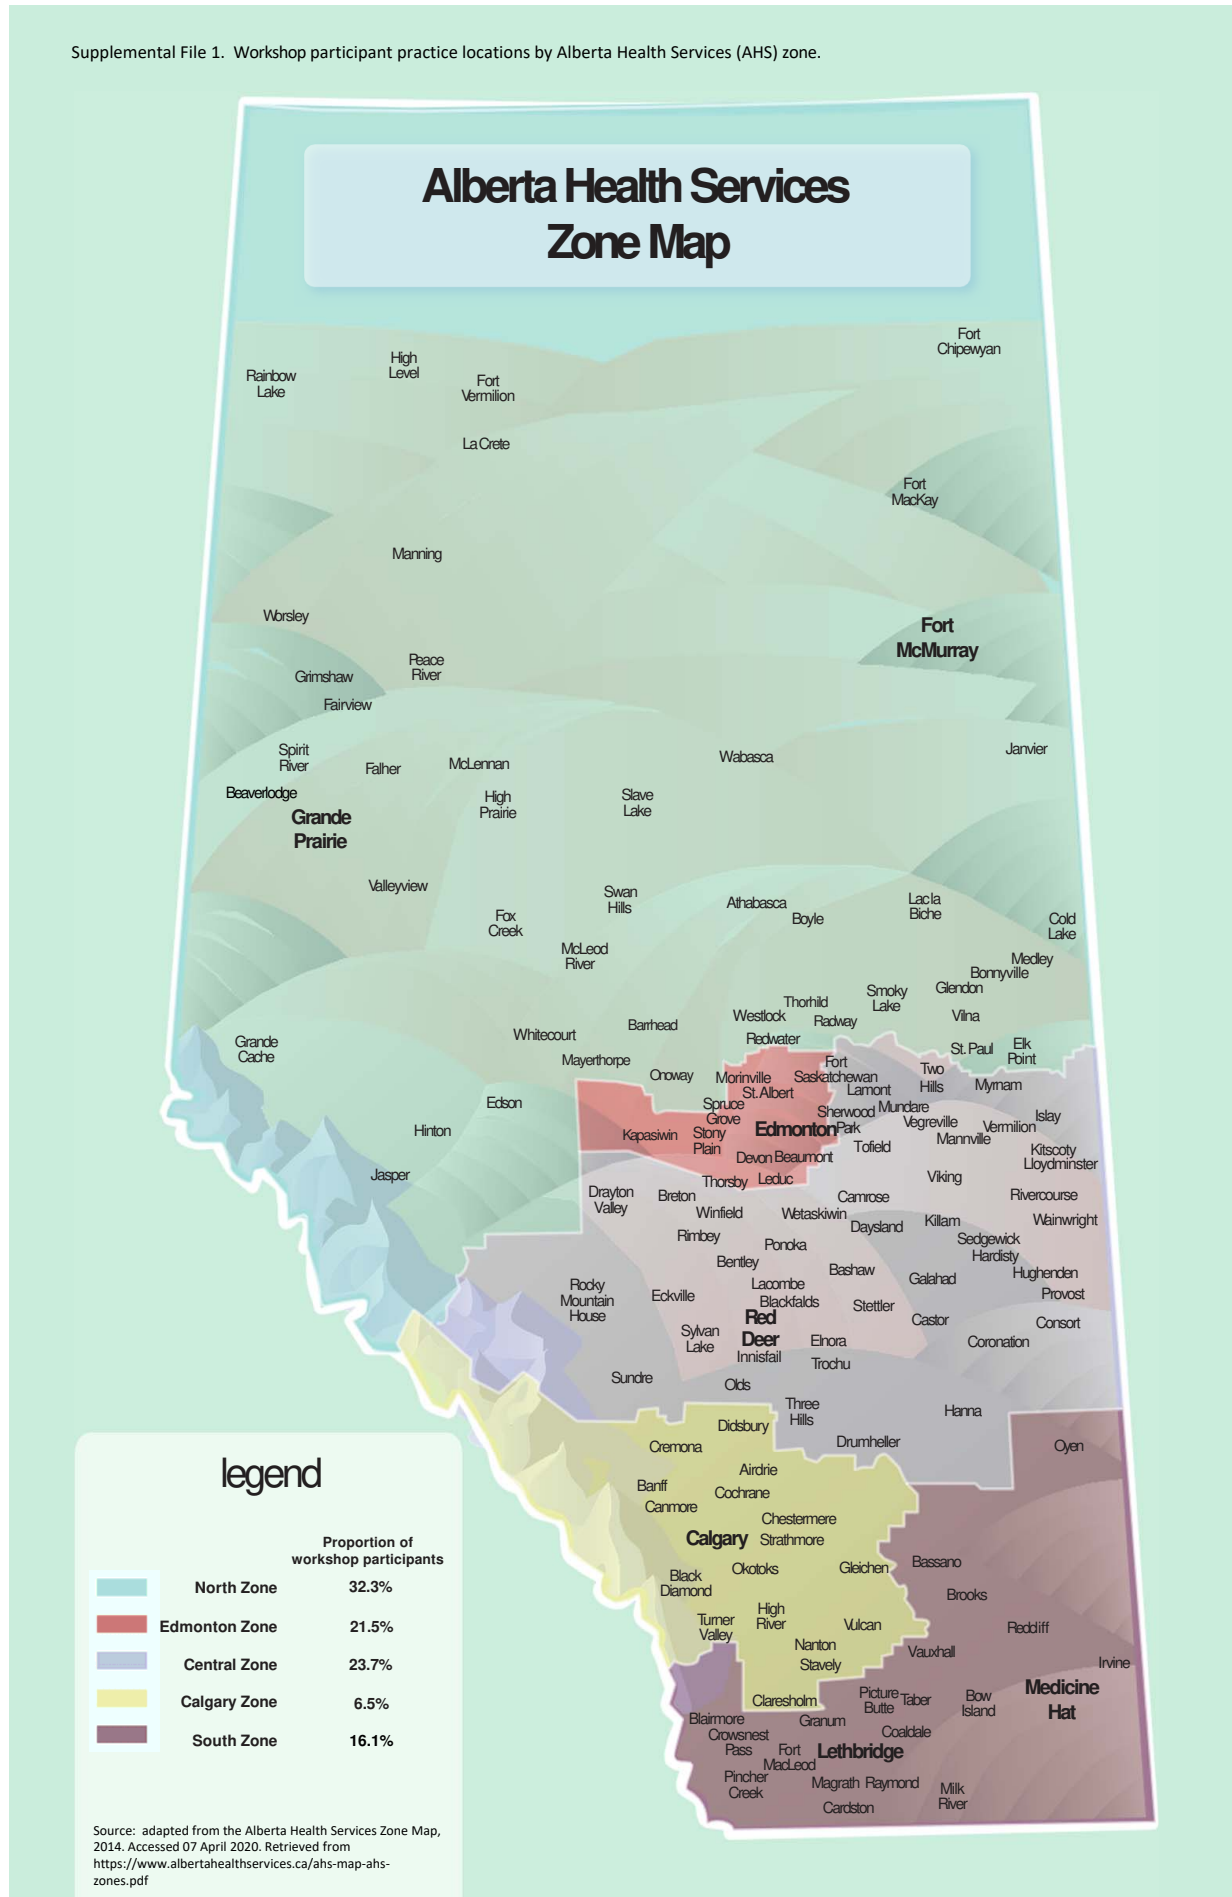

Supplement: bmjopen-2020-046068supp001_data_supplement.pdf [file bmjopen-2020-046068supp001_data_supplement.pdf]
