# Supplementary material for: Enhancing primary care capacity in chronic kidney disease management: a quality improvement educational initiative
Source: HighWire-hosted journal article supplement (doi:10.1136/bmjopen-2020-046068), 2021-11-01
Supplement: bmjopen-2020-046068supp003_data_supplement.pdf [file bmjopen-2020-046068supp003_data_supplement.pdf]

## Chronic Kidney Disease Management: Post-workshop Questionnaire

*Improving chronic kidney disease (CKD) care in the community using health information technology: The CKD Pathway, Nephrology eReferral, and enhanced electronic Comprehensive Annual Care Plan (CACAP)*

This reflective tool is intended to be completed individually, immediately following the workshop. Please record your responses to the following questions:

This questionnaire is anonymous

1. Please rate how comfortable you are able to:

|                                                                            | Very Low <input type="radio"/> | Low <input type="radio"/> | Moderate <input type="radio"/> | High <input type="radio"/> | Very High <input type="radio"/> |
|----------------------------------------------------------------------------|--------------------------------|---------------------------|--------------------------------|----------------------------|---------------------------------|
| Identify a patient with CKD                                                |                                |                           |                                |                            |                                 |
| Administer guideline-concordant medication therapies for CKD patients      | <input type="radio"/>          | <input type="radio"/>     | <input type="radio"/>          | <input type="radio"/>      | <input type="radio"/>           |
| Know when a referral to a Nephrologist is indicated                        | <input type="radio"/>          | <input type="radio"/>     | <input type="radio"/>          | <input type="radio"/>      | <input type="radio"/>           |
| Provide resources and suggest guideline recommended goals for CKD patients | <input type="radio"/>          | <input type="radio"/>     | <input type="radio"/>          | <input type="radio"/>      | <input type="radio"/>           |

2. How likely are you to:

|                               | Very Unlikely <input type="radio"/> | Unlikely <input type="radio"/> | Neutral <input type="radio"/> | Likely <input type="radio"/> | Very Likely <input type="radio"/> |
|-------------------------------|-------------------------------------|--------------------------------|-------------------------------|------------------------------|-----------------------------------|
| Use the CKD Pathway           |                                     |                                |                               |                              |                                   |
| Use eReferral Consult Request | <input type="radio"/>               | <input type="radio"/>          | <input type="radio"/>         | <input type="radio"/>        | <input type="radio"/>             |
| Use eReferral Advice Request  | <input type="radio"/>               | <input type="radio"/>          | <input type="radio"/>         | <input type="radio"/>        | <input type="radio"/>             |
|                               | <input type="radio"/>               | <input type="radio"/>          | <input type="radio"/>         | <input type="radio"/>        | <input type="radio"/>             |

Continued on reverse -->

**Reflective Questions:**

4. Describe opportunities for improvement that you have identified during the process:

5. Describe an action plan to implement improvements, noted above, including overcoming any anticipated barriers:

**Thank you for completing this questionnaire**

**Participant Evaluation Form:** Improving chronic kidney disease (CKD) care in the community using health information technology: The CKD Pathway, Nephrology eReferral, and enhanced electronic Comprehensive Annual Care Plan (CACP)

Date: \_\_\_\_\_

Location: \_\_\_\_\_

**EDUCATIONAL OBJECTIVES: The program met the stated objectives.**

|                                                                                                                                                       | Strongly Disagree     | Disagree              | Neutral               | Agree                 | Strongly Agree        |
|-------------------------------------------------------------------------------------------------------------------------------------------------------|-----------------------|-----------------------|-----------------------|-----------------------|-----------------------|
| 1. Access the online CKD Pathway and identify, medically manage, and appropriately refer patients with CKD, based on evidence-based guidelines        | <input type="radio"/> |
| 2. Access the Nephrology eReferral portal through NetCare and understand when to initiate a referral request and how to complete one.                 | <input type="radio"/> |
| 3. Use the Complex Disease Management (CDM) EMR dashboard to proactively identify and recall Comprehensive Annual Care Plan (CACP) eligible patients. | <input type="radio"/> |
| 4. Access and utilize the enhanced CACP template to streamline workflow and ensure guideline-concordant care delivery for patients with CKD.          | <input type="radio"/> |

**PROGRAM CONTENT AND DELIVERY**

|                                                                           | Strongly Disagree     | Disagree              | Neutral               | Agree                 | Strongly Agree        |
|---------------------------------------------------------------------------|-----------------------|-----------------------|-----------------------|-----------------------|-----------------------|
| The content was relevant to family medicine                               | <input type="radio"/> |
| The content enhanced my knowledge                                         | <input type="radio"/> |
| The content met my expectations                                           | <input type="radio"/> |
| The content was well organized                                            | <input type="radio"/> |
| Disclosure of potential conflicts of interest was clearly communicated    | <input type="radio"/> |
| Faculty members were effective in delivering and facilitating the program | <input type="radio"/> |
| There were adequate opportunities to interact with program faculty        | <input type="radio"/> |
| I will use the information I learned in my practice                       | <input type="radio"/> |
|                                                                           | <input type="radio"/> |

- 
- Please indicate which CanMEDS-FM roles you feel were addressed during this workshop:
- |                                                 |                                       |                                       |
|-------------------------------------------------|---------------------------------------|---------------------------------------|
| <input type="checkbox"/> Family Medicine Expert | <input type="checkbox"/> Communicator | <input type="checkbox"/> Collaborator |
| <input type="checkbox"/> Manager                | <input type="checkbox"/> Scholar      | <input type="checkbox"/> Professional |
| <input type="checkbox"/> Health Advocate        |                                       |                                       |

Did you perceive a degree of commercial bias in any of the following?  Yes  No

Describe two ways in which you will change your practise as a result of attending this program:

What was the **least effective** part of this program? Why?

Please list any topics you would like to see in future programs:
