# Supplementary material for: Enhancing primary care capacity in chronic kidney disease management: a quality improvement educational initiative
Source: HighWire-hosted journal article supplement (doi:10.1136/bmjopen-2020-046068), 2021-11-01
Supplement: bmjopen-2020-046068supp004_data_supplement.pdf [file bmjopen-2020-046068supp004_data_supplement.pdf]

## Supplemental File 4. Challenges and potential solutions to CKD management identified by study participants by professional role categories

| Professional role  | What are the biggest challenges you face in managing CKD patients in your practice?                                 | How do you/could you overcome these challenges (i.e., types of supports that would be helpful)?                                                                                      |
|--------------------|---------------------------------------------------------------------------------------------------------------------|--------------------------------------------------------------------------------------------------------------------------------------------------------------------------------------|
| Dietitian          | Limited communication with the SARP team or nephrologist.                                                           | Facilitating communication lines between specialist clinics and PCN clinic staff for our mutual patients.                                                                            |
|                    | Managing protein and fluid intake.                                                                                  |                                                                                                                                                                                      |
|                    | Communicating effectively with their family physician<br>Understanding when a referral is necessary                 | Clear guidelines for referrals. Better communications with the physicians                                                                                                            |
|                    | Getting patients to adhere to nutrition guidelines                                                                  | Regular follow-ups; client-centered approach.                                                                                                                                        |
|                    | Confidence in identifying those with; when a referral is necessary.                                                 |                                                                                                                                                                                      |
| Nurse Practitioner | patient compliance                                                                                                  | patient education, goal setting, regular follow up, increased financial support for medications would be beneficial                                                                  |
|                    | Lack of knowledge, lack of confidence in implementing the CKD pathway                                               | Reading over the CKD pathway, critical thinking, further education (such as this workshop)                                                                                           |
|                    | BP monitoring, medication compliance                                                                                |                                                                                                                                                                                      |
|                    | readiness of the patient to make changes, physician referral to nephrology when indicated according to the pathway. | I try to set small achievable goals with patient to make a healthy change. I quote the CKD pathway in my letters back to physician when needing to advocate for nephrology referral. |
|                    | Having physician's complete referral to nephrology when indicated.                                                  | More education for physicians on CKD Pathway.                                                                                                                                        |
|                    | knowing the direction/path to follow and facilitating appropriate referrals by physicians                           | key phrases to include in letters to physicians supporting CKD pathway use?                                                                                                          |
|                    | Pt information                                                                                                      | More handouts regarding phosphorous and how often to monitor eGFR if abnormal                                                                                                        |

|                    |                                                                                                                                                                                                                |                                                                                                                                                                                                                                                                                                                                    |
|--------------------|----------------------------------------------------------------------------------------------------------------------------------------------------------------------------------------------------------------|------------------------------------------------------------------------------------------------------------------------------------------------------------------------------------------------------------------------------------------------------------------------------------------------------------------------------------|
| Nurse Practitioner | Distraction from other issues..ex hyperglycemia, tend to focus on optimal glycemic control; education-long term complications or self care.                                                                    | Reviewing guidelines.                                                                                                                                                                                                                                                                                                              |
|                    | Specifically medication dosages in regards to diabetes medications                                                                                                                                             | The newly found CKD pathway and timed right. Online group of peers.                                                                                                                                                                                                                                                                |
|                    | Appropriate timely referrals                                                                                                                                                                                   | Participate in Educational Opportunities                                                                                                                                                                                                                                                                                           |
|                    | maintenance of patient continuity of care; patient returning to same provider time and time again, completing screening labwork, making recommended dietary and lifestyle modifications, medication compliance | establishment of a meaningful, therapeutic relationship with each CKD patient; making myself available for any questions or concerns, assisting with the booking of follow-up appointments with myself while patient is still in the examination room with me (vs. leaving patient responsible for initiation of follow-up visits) |
| Pharmacist         | compliance and access to timely referral follow up. Timely consult info to be received from specialists                                                                                                        |                                                                                                                                                                                                                                                                                                                                    |
|                    | I manage warfarin therapy and CKD patients tend to be more unstable. I would like to spend more time to review the medications but am only involved with warfarin adjustment.                                  | Access to a 'specialist' if there are any questions about drug therapy for patients in our acute care hospital                                                                                                                                                                                                                     |
|                    | Lack of thorough, in-depth knowledge of current guidelines to confidently manage/suggest medication adjustments.                                                                                               | More education re: same topic and a resource to refer to as needed.                                                                                                                                                                                                                                                                |
|                    | Helping patients get access to CKD care                                                                                                                                                                        | Understanding the CKD pathway and system, and better utilizing the resources available on Netcare                                                                                                                                                                                                                                  |
| Physician          | Knowing when is best to refer to nephrology                                                                                                                                                                    | Guidelines with this - sounds like this presentation will provide this                                                                                                                                                                                                                                                             |
|                    | need for diuretics, ace inhibitors                                                                                                                                                                             | more guidance from specialists                                                                                                                                                                                                                                                                                                     |
|                    | CONVINCING THEM TO ATTAIN GOOD CONTROL OF THEIR CONCURRENT DM, HTN                                                                                                                                             | PCN DIABETIC CARE GROUP AND DNCP ARE OF GREAT HELP, THOUGH SOME PATIENT SIMPLY DO NOT CARE                                                                                                                                                                                                                                         |
|                    | Distance needed to travel to see nephrology and to go for dialysis if required                                                                                                                                 | Telehealth with nephrology, have a few dialysis units closer to home                                                                                                                                                                                                                                                               |

|           |                                                                                                                                                                                                                                                                                                                                                                                                                                                                |                                                                                                                                                                                                           |
|-----------|----------------------------------------------------------------------------------------------------------------------------------------------------------------------------------------------------------------------------------------------------------------------------------------------------------------------------------------------------------------------------------------------------------------------------------------------------------------|-----------------------------------------------------------------------------------------------------------------------------------------------------------------------------------------------------------|
| Physician | medications, patient compliance                                                                                                                                                                                                                                                                                                                                                                                                                                | better online guidelines about CKD and comorbidities                                                                                                                                                      |
|           | complex patients with multiple medical problems                                                                                                                                                                                                                                                                                                                                                                                                                | pcn nurse, nephrologist, treatment guidelines                                                                                                                                                             |
|           | getting advice from nephrologist, I would like to get recommendation on the first visit (and letter) then when I need, most of the time yearly or less frequently                                                                                                                                                                                                                                                                                              | I cannot, it is the system I have to live with                                                                                                                                                            |
|           | knowing how adjust some of the medications as Crcl declines: ie metformin, ACE ARB, NOACs, antibiotics                                                                                                                                                                                                                                                                                                                                                         | good APPS, and Netcare info                                                                                                                                                                               |
|           | Time needed to manage their health care needs                                                                                                                                                                                                                                                                                                                                                                                                                  | Involvement of the PCN more in the renal failure                                                                                                                                                          |
|           | lack of available timely referral to nephrology                                                                                                                                                                                                                                                                                                                                                                                                                | central coordinating                                                                                                                                                                                      |
|           | I am a locum now and do not see pts on a longitudinal basis, though I work in the same 2 clinics most of the time ...when I had my own practice here, a main problem was and still remains getting access to nephrology. our system had only one nephrologist and I did not find him helpful. The prov renal programme does follow pat's regularly and the nurse sends follow-up notes , very rarely from the nephrologist re his long term thinking or plans. | More use is now being made of tele med. the closest actual out reach clinic is 1.5 hrs away, which is a huge issue for the commonly elderly and debilitated pts. our local dialysis unit was removed.     |
|           | compliance                                                                                                                                                                                                                                                                                                                                                                                                                                                     | engage family members                                                                                                                                                                                     |
|           | Knowing when to refer and most optimal monitoring and treatment                                                                                                                                                                                                                                                                                                                                                                                                | UpToDate reading and occasional referrals                                                                                                                                                                 |
|           | Compliance with disease modification strategies.                                                                                                                                                                                                                                                                                                                                                                                                               | Education supports for patients in the form of healthy living education similar to what we have for obesity and diabetes or any other resources developed for the same purpose that have been successful. |
|           | Long waiting times                                                                                                                                                                                                                                                                                                                                                                                                                                             | More nephrologists in the country                                                                                                                                                                         |
|           | access to resources                                                                                                                                                                                                                                                                                                                                                                                                                                            | better referral system locally                                                                                                                                                                            |
|           | timely access to nephrology                                                                                                                                                                                                                                                                                                                                                                                                                                    | more nephrologists available in Red Deer                                                                                                                                                                  |
|           | Delayed referral                                                                                                                                                                                                                                                                                                                                                                                                                                               |                                                                                                                                                                                                           |

|                                       |                                                                                                                                                                      |                                                                                                                                   |
|---------------------------------------|----------------------------------------------------------------------------------------------------------------------------------------------------------------------|-----------------------------------------------------------------------------------------------------------------------------------|
| Physician                             | adherence to therapy                                                                                                                                                 | Patient education for patients prior to deteriorating to the point of requiring referral to a nephrologist.                       |
|                                       | Adjusting doses                                                                                                                                                      | would like to hear from you                                                                                                       |
|                                       | young population in our community means lower numbers of ckd patients which doesn't encourage development of expertise.                                              | Locally run Diabetic nephropathy prevention clinic has been super helpful.                                                        |
|                                       | access to dialysis                                                                                                                                                   | move the patients to Calgary!                                                                                                     |
|                                       | keeping track of their renal function and ensure appropriate care                                                                                                    | more clear guidelines in regards to appropriate referral                                                                          |
|                                       | Compliance                                                                                                                                                           | Have local PCN nurse follow up patients in this regard                                                                            |
|                                       | Identifying total risk                                                                                                                                               | Learn                                                                                                                             |
|                                       | Referral access to Nephrology Effective interventions                                                                                                                | More specific criteria for acceptance for special populations                                                                     |
|                                       | Knowing how to manage their medications, remembering to titrate the doses of other medications                                                                       | Setting a pop up in the EMR to remind me to consider renal clearance when writing any prescription for a patient would be helpful |
|                                       | Providing care for patients on dialysis                                                                                                                              | Telehealth                                                                                                                        |
|                                       | Not knowing exactly when to refer to nephrology as eGFR is slowly trending down.                                                                                     | Teachings!                                                                                                                        |
|                                       | Helping them manage their chronic pain with limited choices of medications where NSAIDS are choice. Poorly controlled hypertension, poorly controlled hyperglycemia. | Identifying barriers to improving, barriers are multifaceted as well.                                                             |
|                                       | medication, fluid                                                                                                                                                    | simple hand out easy access to specialist advise                                                                                  |
|                                       | Controlling their risk factors                                                                                                                                       | Our good health team                                                                                                              |
| Knowing when to refer. How to monitor | Guidelines                                                                                                                                                           |                                                                                                                                   |

|           |                                                                                                                                     |                                                                                                                                                                                                                          |
|-----------|-------------------------------------------------------------------------------------------------------------------------------------|--------------------------------------------------------------------------------------------------------------------------------------------------------------------------------------------------------------------------|
| Physician | Control of diabetes/BP/phosphate intake, prevention/management of renal osteodystrophy and management of anemia.                    | Expansion of service provided by diabetic nephropathy prevention clinic to become more of a nephropathy prevention clinic (include non-diabetics with nephropathy as well as diabetics who do not yet have nephropathy). |
|           | Getting too much diuretics from other sources (walk-in clinics, hospital ER doctors). Patients failed to follow up BP.              | Educating the patients.                                                                                                                                                                                                  |
|           | Keeping the kidney function from declining even further                                                                             | Referral to a nephrologist                                                                                                                                                                                               |
|           | Lifestyle changes                                                                                                                   | Lifestyle help - weight loss / diabetes                                                                                                                                                                                  |
|           | WHEN TO REFER AND BEST MEDICATION PRACTICES                                                                                         | ANTICIPATE THIS EDUCATIONAL SESSION WILL BE VERY HELPFUL                                                                                                                                                                 |
|           | long wait to see a specialist                                                                                                       | means for getting advice faster                                                                                                                                                                                          |
|           | Educating patients about what CKD is, motivating them to take medication or make lifestyle changes.                                 | Easy access to nursing education support and help monitoring patients for adherence and follow up. Occasionally, quick access to Nephro for non-urgent advice.                                                           |
|           | Losing patients to regular follow up.                                                                                               | Utilization of reminders for patients to follow up.                                                                                                                                                                      |
|           | managing other medications patients might be on                                                                                     | booklet of other drugs that may need dosage adjustments have one for antibiotics                                                                                                                                         |
|           | Figuring out what the cause of their CKD is to explain it to patients.                                                              | I'm not sure.                                                                                                                                                                                                            |
|           | diabetes management, compliance, patient understanding of their disease                                                             | PCN supports, specialist involvement, regular follow up                                                                                                                                                                  |
|           | Compliance to chronic medications                                                                                                   | Bubble pack, support groups                                                                                                                                                                                              |
|           | Identifying patients requiring specialist referral<br>Preventing progression of CKD dose adjusting medication for patients with CKD | Better use of CKD pathway                                                                                                                                                                                                |

|                    |                                                                                                                                                       |                                                                                                                                                                                                                                     |
|--------------------|-------------------------------------------------------------------------------------------------------------------------------------------------------|-------------------------------------------------------------------------------------------------------------------------------------------------------------------------------------------------------------------------------------|
| Physician          | Getting specialist input                                                                                                                              | Learn more about the Netcare referral and advice                                                                                                                                                                                    |
|                    | dose adjustments for common medications and what alternatives to use for comorbidities requiring NSAID treatment                                      |                                                                                                                                                                                                                                     |
|                    | time to manage, referral always out of town                                                                                                           | Telehealth, more feedback from the specialists                                                                                                                                                                                      |
|                    | Lack of continuity as resident                                                                                                                        | Graduate and have my own practice                                                                                                                                                                                                   |
|                    | little experience, knowledge of renal dosing of drugs                                                                                                 | look it up! use the CKD pathway!                                                                                                                                                                                                    |
|                    | Lack of resources in the community; unclear pathway-to refer or not to refer                                                                          | more education/training regarding resources available; Patient education programs                                                                                                                                                   |
|                    | Rural location; Patient location-pt. on reserve                                                                                                       | Dialysis in our own community; utilize our CDM Team                                                                                                                                                                                 |
|                    | poor diabetes control, traveling for dialysis-missed appt.                                                                                            | frequent contact with pt.                                                                                                                                                                                                           |
|                    | pt. compliance; Delay in response of specialist                                                                                                       | Training                                                                                                                                                                                                                            |
| Other Clinic staff | Understanding CKD, patient education. Accessing resources. Variable recommendations/ guidelines. Patient access (rural area) - pts lost to follow up. | Closer monitoring of patients - improve use of EMR database to track and monitor testing/follow ups etc. Clear and consistent guidelines Improved/timely access to specialist Improve my understanding and use of netcare resources |
|                    | One of the biggest challenges I have faced is waitlists for patients to be seen by some nephrologists in the Edmonton area.                           | Within some of our clinics we have in house nephrologists that we have referred to who have been able to have patients be assessed in a more timely fashion.                                                                        |
|                    | When to refer                                                                                                                                         | More education                                                                                                                                                                                                                      |
|                    | lack of knowledge                                                                                                                                     | become more educated                                                                                                                                                                                                                |
|                    | REFERRALS- WAIT TIMES                                                                                                                                 | CALL MANY PLACES                                                                                                                                                                                                                    |
