# Supplementary material for: Enhancing primary care capacity in chronic kidney disease management: a quality improvement educational initiative
Source: HighWire-hosted journal article supplement (doi:10.1136/bmjopen-2020-046068), 2021-11-01
Supplement: bmjopen-2020-046068supp005_data_supplement.pdf [file bmjopen-2020-046068supp005_data_supplement.pdf]

## Supplemental File 5. Workshop Evaluation Results (n=48)

|                          | The content was relevant to family medicine |             | The content enhanced my knowledge |             | The content met my expectations |             | The content was well organized |             | Potential conflicts of interest were clearly communicated |             | Faculty members were effective in delivering and facilitating the program |             | There were adequate opportunities to interact with program faculty |             | I will use the information I learned in my practice |             |
|--------------------------|---------------------------------------------|-------------|-----------------------------------|-------------|---------------------------------|-------------|--------------------------------|-------------|-----------------------------------------------------------|-------------|---------------------------------------------------------------------------|-------------|--------------------------------------------------------------------|-------------|-----------------------------------------------------|-------------|
|                          | n                                           | %           | n                                 | %           | n                               | %           | n                              | %           | n                                                         | %           | n                                                                         | %           | n                                                                  | %           | n                                                   | %           |
| <b>Strongly Agree</b>    | 31                                          | <b>64.6</b> | 28                                | <b>58.3</b> | 22                              | <b>45.8</b> | 26                             | <b>54.2</b> | 25                                                        | <b>52.1</b> | 26                                                                        | <b>54.2</b> | 22                                                                 | <b>45.8</b> | 27                                                  | <b>56.3</b> |
| <b>Agree</b>             | 15                                          | <b>31.3</b> | 16                                | <b>33.3</b> | 20                              | <b>41.7</b> | 16                             | <b>33.3</b> | 18                                                        | <b>37.5</b> | 17                                                                        | <b>35.4</b> | 18                                                                 | <b>37.5</b> | 16                                                  | <b>33.3</b> |
| <b>Neutral</b>           | 0                                           | <b>0.0</b>  | 1                                 | <b>2.1</b>  | 2                               | <b>4.2</b>  | 0                              | <b>0.0</b>  | 1                                                         | <b>2.1</b>  | 1                                                                         | <b>2.1</b>  | 3                                                                  | <b>6.3</b>  | 0                                                   | <b>0.0</b>  |
| <b>Disagree</b>          | 0                                           | <b>0.0</b>  | 0                                 | <b>0.0</b>  | 0                               | <b>0.0</b>  | 0                              | <b>0.0</b>  | 0                                                         | <b>0.0</b>  | 0                                                                         | <b>0.0</b>  | 0                                                                  | <b>0.0</b>  | 0                                                   | <b>0.0</b>  |
| <b>Strongly Disagree</b> | 0                                           | <b>0.0</b>  | 0                                 | <b>0.0</b>  | 0                               | <b>0.0</b>  | 0                              | <b>0.0</b>  | 0                                                         | <b>0.0</b>  | 0                                                                         | <b>0.0</b>  | 0                                                                  | <b>0.0</b>  | 0                                                   | <b>0.0</b>  |
| <b>did not answer</b>    | 2                                           | <b>4.2</b>  | 3                                 | <b>6.3</b>  | 4                               | <b>8.3</b>  | 6                              | <b>12.5</b> | 4                                                         | <b>8.3</b>  | 4                                                                         | <b>8.3</b>  | 5                                                                  | <b>10.4</b> | 5                                                   | <b>10.4</b> |
| <b>Total</b>             | 48                                          | 100.0       | 48                                | 100.0       | 48                              | 100.0       | 48                             | 100.0       | 48                                                        | 100.0       | 48                                                                        | 100.0       | 48                                                                 | 100.0       | 48                                                  | 100.0       |
